# Supplementary material
Source: PubMed Central journal article supplement (PMC5632944)
Supplement: NIHMS896256-supplement-Supp.pdf [file NIHMS896256-supplement-Supp.pdf]

**ESM Table 1** Outcomes of interest—site-specific cancer mortality

| Type of cancer | ICD-9 code(s) | ICD-10 code(s) | No. of deaths |
|----------------|---------------|----------------|---------------|
| Any cancer     | 140–208       | C00–C97        | 39,386        |
| Oesophagus     | 150           | C15            | 1449          |
| Stomach        | 151           | C16            | 6644          |
| Colorectum     | 153, 154      | C18–C21        | 4409          |
| Colon          | 153           | C18            | 2811          |
| Rectum         | 154           | C19–C21        | 1598          |
| Liver          | 155           | C22            | 3966          |
| Bile duct      | 155.1, 156.1  | C22.1, C24.0   | 581           |
| Gallbladder    | 156           | C23, C24       | 1712          |
| Pancreas       | 157           | C25            | 2546          |
| Lung           | 162           | C33, C34       | 8255          |
| Breast         | 174           | C50            | 1122          |
| Endometrium    | 182           | C54            | 167           |
| Cervix         | 180           | C53            | 311           |
| Ovary          | 183           | C56            | 466           |
| Prostate       | 185           | C61            | 842           |
| Bladder        | 188           | C67            | 549           |
| Kidney         | 189           | C64–C66, C68   | 607           |
| Thyroid        | 193           | C73            | 160           |
| Lymphoma       | 200–202       | C81–C86, C96   | 906           |
| Leukaemia      | 204–208       | C91–C95        | 876           |

| <b>ESM Table 2</b> Diabetes duration and selected site-specific cancer mortality <sup>a</sup> |             |                                |                                |                       |
|-----------------------------------------------------------------------------------------------|-------------|--------------------------------|--------------------------------|-----------------------|
| Type of cancer                                                                                | No diabetes | Diabetes duration<br>< 5 years | Diabetes duration<br>≥ 5 years | <i>p</i> <sup>c</sup> |
| Any cancer                                                                                    |             |                                |                                |                       |
| Deaths (n)                                                                                    | 9257        | 451                            | 502                            |                       |
| HR (95% CI) <sup>b</sup>                                                                      | 1.00        | 1.34 (1.21, 1.47)              | 1.23 (1.13, 1.35)              | 0.25                  |
| Colorectum                                                                                    |             |                                |                                |                       |
| Deaths (n)                                                                                    | 1188        | 74                             | 89                             |                       |
| HR (95% CI) <sup>b</sup>                                                                      | 1.00        | 1.63 (1.29, 2.07)              | 1.57 (1.26, 1.96)              | 0.77                  |
| Liver                                                                                         |             |                                |                                |                       |
| Deaths (n)                                                                                    | 968         | 71                             | 63                             |                       |
| HR (95% CI) <sup>b</sup>                                                                      | 1.00        | 2.00 (1.34, 2.98)              | 1.40 (0.83, 2.34)              | 0.09                  |
| Gallbladder                                                                                   |             |                                |                                |                       |
| Deaths (n)                                                                                    | 273         | 16                             | 10                             |                       |
| HR (95% CI) <sup>b</sup>                                                                      | 1.00        | 2.07 (0.86, 5.03)              | 1.23 (0.65, 2.34)              | 0.66                  |
| Pancreas                                                                                      |             |                                |                                |                       |
| Deaths (n)                                                                                    | 526         | 29                             | 26                             |                       |
| HR (95% CI) <sup>b</sup>                                                                      | 1.00        | 1.62 (1.11, 2.36)              | 1.21 (0.68, 2.14)              | 0.26                  |
| Breast                                                                                        |             |                                |                                |                       |
| Deaths (n)                                                                                    | 436         | 24                             | 34                             |                       |
| HR (95% CI) <sup>b</sup>                                                                      | 1.00        | 1.67 (1.10, 2.54)              | 2.29 (1.60, 3.27)              | 0.49                  |

<sup>a</sup>Data were available only from the Shanghai Men's Health Study, Shanghai Women's Health Study, Cardiovascular Disease Risk Factor Two-Township Study, Singapore Chinese Health Study, Korea Multicenter Cancer Cohort Study, and Seoul Male Cohort Study.

<sup>b</sup>Estimated by comparison of the HR for subjects with a diagnosis of diabetes < 5 years with the HR for subjects with a diagnosis of diabetes ≥ 5 years.

<sup>c</sup>Hazard ratios were adjusted for sex, baseline age, BMI, cigarette smoking, alcohol consumption, educational attainment, and urban residence.

**ESM Table 3** Diabetes treatment and selected site-specific cancer mortality<sup>a</sup>

| Type of cancer           | No diabetes | Diabetes not treated | Diabetes treated  | <i>p</i> <sup>c</sup> |
|--------------------------|-------------|----------------------|-------------------|-----------------------|
| Any cancer               |             |                      |                   |                       |
| Deaths (n)               | 11 983      | 202                  | 515               |                       |
| HR (95% CI) <sup>b</sup> | 1.00        | 1.10 (0.96, 1.27)    | 1.38 (1.19, 1.60) | 0.03                  |
| Colorectum               |             |                      |                   |                       |
| Deaths (n)               | 1368        | 28                   | 54                |                       |
| HR (95% CI) <sup>b</sup> | 1.00        | 1.42 (0.97, 2.07)    | 1.27 (0.96, 1.67) | 0.32                  |
| Liver                    |             |                      |                   |                       |
| Deaths (n)               | 1138        | 32                   | 95                |                       |
| HR (95% CI) <sup>b</sup> | 1.00        | 1.82 (1.28, 2.60)    | 2.56 (1.94, 3.38) | 0.12                  |
| Gallbladder              |             |                      |                   |                       |
| Deaths (n)               | 663         | 10                   | 29                |                       |
| HR (95% CI) <sup>b</sup> | 1.00        | 1.15 (0.54, 2.44)    | 1.44 (0.98, 2.10) | 0.84                  |
| Pancreas                 |             |                      |                   |                       |
| Deaths (n)               | 964         | 17                   | 53                |                       |
| HR (95% CI) <sup>b</sup> | 1.00        | 1.40 (0.86, 2.27)    | 1.86 (1.40, 2.46) | 0.44                  |

<sup>a</sup>Data were available only from the Japan Public Health Center-Based Prospective Study 1 and 2, Miyagi Cohort Study, and Ohsaki National Health Insurance Beneficiaries Cohort Study.

<sup>b</sup>Estimated by comparison of the HR for subjects treated for diabetes with the HR for subjects not treated for diabetes.

<sup>c</sup>Hazard ratios were adjusted for sex, baseline age, BMI, cigarette smoking, alcohol consumption, educational attainment, and urban residence.
